# 1 Patterns of *Mustelid gammaherpesvirus 1* (MusGHV-1) genital reactivation linked to 2 stressors in adult European badgers (*Meles meles*)

3  
4 Ming-shan Tsai<sup>1\*</sup>, Sarah Francois<sup>2</sup>, Chris Newman<sup>1,3</sup>, David W. Macdonald<sup>1</sup>, Christina D. Buesching<sup>3,4</sup>

## 5 6 **Affiliation**

- 7 1. Wildlife Conservation Research Unit, Department of Zoology, University of Oxford, Recanati-Kaplan  
8 Centre, Abingdon Road, Tubney House, Tubney, Oxfordshire OX13 5QL, UK
- 9 2. Evolve.zoo, Department of Zoology, University of Oxford, Peter Medawar Building, South Park Road,  
10 Oxford, OX1 3SY, UK
- 11 3. Cook's Lake Farming Forestry and Wildlife Inc (Ecological Consultancy), Queens County, Nova Scotia,  
12 Canada
- 13 4. Department of Biology, Irving K. Barber Faculty of Science, The University of British Columbia,  
14 Okanagan, Kelowna, British Columbia, Canada

15 \*Correspondence: cindy150051@gmail.com

## 16 17 **Abstract**

18 Herpesvirus infections are common and mostly asymptomatic in vertebrates, but can result in  
19 impaired reproduction. It is therefore important to understand infection patterns and associated risk  
20 factors, particularly the effects of different stressors. Here we use Mustelid gammaherpesvirus 1  
21 (MusGHV-1) infection in European badgers (*Meles meles*) as a host-pathogen wildlife model to study  
22 the effects of a variety of demographic, social, physiological and environmental stressors on viral  
23 reactivation in the genital tract. We collected 251 genital swabs from 151 free-ranging individuals  
24 across 3 trapping seasons (spring, summer and autumn). We screened for MusGHV-1 using PCR and  
25 explored possible links between genital MusGHV-1 reactivation and stressors, and their interactions,  
26 using logistic regression. In adults, reactivation was more likely in males, especially those in poorer  
27 body condition during summer. In females, reactivation was more likely when living in social groups  
28 comprising a higher percentage of cubs, but counter to our predictions, recent lactation appeared not  
29 influential. In relation to age, reactivation was more common in individuals over 8 years old than  
30 among prime age adults, and among juveniles (<2 years old), especially females and individuals in  
31 better body condition, likely due to early puberty. Environmentally, reactivation was more prevalent  
32 in summer when food abundance is typically low. Our results evidence age effects on MusGHV-1  
33 reactivation; in juveniles MusGHV-1 shedding in the genital tract is likely related to primary infection,  
34 while in adults, genital MusGHV-1 reactivation from latency was associated with aging, social and/ or  
35 environmental stress.

36  
37 **Keywords:** Stress, herpesvirus reactivation, gammaherpesvirus infection, sexually transmittable  
38 diseases, STI, wildlife disease epidemiology

39

## 40 **Importance**

41 The immuno-suppressive effects of elevated stress levels facilitate disease development, and can  
42 ultimately cause host extinction at the population level, especially where diseases are transmitted  
43 sexually. The impacts of stress on host-pathogen dynamics through disease, however, are still poorly  
44 understood outside the laboratory or captive environments. Our study provides rare evidence from a  
45 free-ranging wild mammal population that the infection dynamics of a common and sexually  
46 transmittable gammaherpesvirus are linked to demographic, social, physiological and environmental  
47 stress. We propose that the effects of stressors on STIs and viral reactivation are an important factor  
48 to be taken into account in conservation efforts when working with vulnerable wildlife populations.

49

## 50 **Introduction**

51 Herpesvirus infection is common in vertebrates with most vertebrate herpesviruses belonging to 4  
52 subfamilies, the *Alphaherpesvirinae*, *Betaherpesvirinae*, *Gammaherpesvirinae* and *Deltaherpesvirinae*  
53 (1, 2). Herpesvirus species are generally host-specific, but cross-species transmission is more frequent  
54 than previously assumed (3, 4). After primary infection, the herpesvirus enters a latent stage in the  
55 host cell (e.g. lymphocytes in gammaherpesvirus infection), and can be reactivated repeatedly  
56 throughout life by stress (5, 6), trauma (e.g. surgery:(7)) or primary co-infection with other pathogens  
57 (8). Reactivation is a process of viral lytic infection, which involves virus replication within the host cell,  
58 eventually destroying the cell and releasing infectious virions. Reactivation of herpesviruses usually  
59 occurs in the epithelial cells of mucosa that function as portals for external contact (e.g., mouth, nose,  
60 eyes and genital tract), thus facilitating transmission. Reactivation is, however, typically asymptomatic  
61 or induces only mild disease, but can also promote development of severe diseases like cancer (9),  
62 depending on strain pathogenicity (10) and co-infection with other pathogens causing  
63 immunodeficiency (e.g. Human herpesvirus 8 and HIV (11)), and is associated with a higher risk of  
64 contracting co-infection with additional pathogens with high virulence (e.g. *Chlamydia pecorum*  
65 infection in koalas suffering from gammaherpesvirus reactivation (12)).

66

67 Chronic stress has proven a significant risk factor, causing immune system dysregulation. where  
68 corticosteroids inhibit the pro-inflammatory cytokine responses, allowing the virus to (re-)activate and  
69 undergo lytic proliferation unchecked (13). This link between elevated corticosteroid levels and  
70 herpesvirus reactivation has been proven experimentally (horses: (14); captive reindeer: (15) and  
71 through observation (e.g. humans: (6, 16); captive Grévy's zebras (*Equus grevyi*): (5), but has not been  
72 investigated in free-living wildlife populations.

73

74 Here, we use European badgers (*Meles meles*) as a wildlife model to investigate how different risk  
75 factors and stressors affect herpesvirus reactivation. Badgers are seasonally breeding mustelids that  
76 are commonly infected with the *Mustelid gammaherpesvirus 1* (MusGHV-1: a large double-stranded

77 DNA virus belonging to the *Gammaherpesvirinae*, genus *Percavirus*), where prevalence of viral DNA in  
78 blood samples can reach up to 100% in the UK and in Ireland (17, 18), and 55% - 82.5% in genital swab  
79 samples (19, 20). Gammaherpesvirus reactivation can cause severe disease in humans (21, 22) and  
80 domestic animals (23–25), and has increasingly been associated with illness in wildlife species (26–29).  
81 In badgers, previous research has linked otherwise asymptomatic MusGHV-1 reactivation in genital  
82 tracts to impaired female reproductive performance (20) and indicates that during the main mating  
83 season, adult males are at particular risk of genital MusGHV-1 reactivation. Nevertheless, the impact  
84 of social, physiological and environmental stress on MusGHV-1 reactivation has thus far not been  
85 investigated. Badgers are subject to a variety of stressors: faecal corticoid levels indicate that badgers  
86 experience seasonal variation in stress levels (30, 31), which may be due to variation in food availability  
87 (30, 31) and can result in mortality (32, 33). Sociologically, higher social group density is associated  
88 with female reproductive suppression (34, 35), reduced body condition and fecundity (36), and  
89 increased bite wounding among male badgers (37). Furthermore, aging reduces tolerance to stress  
90 (38), specifically altering the balance of innate and acquired immunity in badgers (39), and increasing  
91 their risk of herpesvirus reactivation (20), as also observed in other carnivora species (40, 41),  
92 sometimes resulting in chronic and continuous herpesvirus reactivation (42). Therefore metrics of  
93 body condition, especially reduced body-condition as a consequence of recent lactation (30, 43), can  
94 indicate that the individual may be experiencing physiological stress (30).

95

96 To evaluate the impact of potential stressors on genital MusGHV-1 reactivation, we conducted  
97 population-wide molecular screening using genital swabs taken from a free-ranging badger population  
98 in the south of England across 3 seasons (spring, summer and autumn). We investigated whether  
99 environmental factors (i.e., season and social group size), host demographic parameters (i.e., sex, age  
100 and lactation), and host health (i.e., body condition) affect risk of genital MusGHV-1 reactivation.

101

## 102 **Materials and methods**

### 103 Field data and sample collection

104 Samples were collected from 151 individual live-trapped badgers in Wytham Woods, Oxfordshire, UK  
105 (51°46'26"N, 1°19'19"W; caught in May, September and November 2018 following the methodology  
106 described in Macdonald et al. (44); for details see Table 1). All trapping and animal sampling protocols  
107 were approved by the University of Oxford' Animal Welfare and Ethical Review Board. Trapping was  
108 conducted under Natural England license (currently 2019-38863, Badger Act 1992) and all animal  
109 handling procedures were carried out by qualified Personal Individual License (PIL) holders under  
110 Home Office license (current PPL 30/3379, Animals (Scientific Procedures) Act 1986). For each capture,  
111 we recorded sex, sett (i.e., communal den used by a badger social group) of capture, body condition  
112 score (BCS, categorized as 1= very thin to 5= very fat), and lactational status (determined by teat  
113 measurements of females in spring: (45)). Because each badger in Wytham is given an individual tattoo  
114 at first capture (usually as a cub (46)), exact age (in years) was known for most (243 of 251) animals in

115 the dataset. For the remaining 8 badgers first caught as adults, age was inferred by toothwear  
116 according to the method described Bright Ross et al. (47). We defined 4 age classes:  
117 i) juveniles < 2 years old (cubs and yearlings were combined to increase sample sizes, as there was no  
118 difference between Mus GHV-1 prevalence in cubs and yearlings: Fisher's exact test: p-value=0.7449);  
119 and - based on sex-steroid levels (48); ii) young adults:  $2 \leq x < 5$  years old; iii) old adults:  $5 \leq x < 8$  years  
120 old; iv) very old adults:  $\geq 8$  years old. The number of cubs and adults resident in each sett was  
121 estimated using minimum number alive (MNA) estimates (44, 47).

122

123 Sterile cotton tops with wooden shafts were used to swab the genital tracts of all females (cubs and  
124 adults) and all males (except for very small male cubs in spring for animal welfare reasons), and stored  
125 in 2 ml sterile microcentrifuge tubes. All samples were frozen and stored at  $-20^{\circ}\text{C}$  immediately after  
126 sampling. Badgers were released at their site of capture on the same day, after full recovery from  
127 anaesthesia.

128

#### 129 DNA extraction and purification

130 Each swab was reconstituted with 400 $\mu\text{l}$  sterile double distilled water and vortexed gently at room  
131 temperature for 10 minutes. A 200 $\mu\text{l}$  aliquot was taken from the reconstituted swab fluids, and viral  
132 DNA was extracted and purified using a commercial kit (DNeasy Blood and Tissue Kit, Qiagen) following  
133 manufacturer's instructions. Purified DNA was then eluted in 100 $\mu\text{l}$  of the provided buffer.

134

#### 135 Screening for MusGHV-1 DNA using polymerase chain reaction (PCR) and sequencing

136 The purified DNA was screened using a MusGHV-1-specific primer pair designed by King et al. 2004  
137 (18), targeting 281 base pairs of the partial DNAPol gene. For each reaction, a total of 20  $\mu\text{l}$  PCR  
138 solution was mixed with 10 $\mu\text{l}$  HotStartTaq Master Mix (Qiagen, containing 1 unit of HotStartTaq DNA  
139 Polymerase, 12 $\mu\text{M}$  of  $\text{MgCl}_2$  and 1.6 $\mu\text{M}$  of each dNTP), 0.5  $\mu\text{M}$  of each primer, and 2 $\mu\text{l}$  CoralLoad gel  
140 loading dye and 5  $\mu\text{l}$  DNA template. Amplification conditions were kept at  $95^{\circ}\text{C}$  for 5 mins to activate  
141 DNA polymerase, followed by 45 cycles of denaturation at  $95^{\circ}\text{C}$  for 45 seconds, primer annealing at  
142  $60^{\circ}\text{C}$  for 45 seconds, and chain elongation at  $72^{\circ}\text{C}$  for 1 minute, followed by a final extension at  $72^{\circ}\text{C}$   
143 for 10 minutes. Finally, the PCR products were loaded in 2% agarose gel to check the amplification  
144 results under UV light. Samples with positive results were then amplified again with substituted front  
145 primer (5' CCA AGC AGT GCA TAG GAG GT 3') to generate longer sequences (771 base pairs). PCR  
146 products were then purified and sent for genotyping using Sanger sequencing to confirm the identity  
147 of produced amplicon. Sequences returned were then aligned by Clustal W method (49) and analyzed  
148 for variation using MEGA X (10.1.7) (50). Representative sequences were selected and published on  
149 GenBank under accession number MT332100 and MT332101 assigned.

150

#### 151 Statistical analysis

152 Statistical analyses were performed with the R and R Studio software (version 1.21335) (51).  
153 Prevalence of genital MusGHV-1 DNA was calculated by dividing the number of PCR positive cases by  
154 the total number of tested cases, and 5% upper and lower confidence intervals were calculated using  
155 the Wilson method (52). Logistic regression (glmer function, R package lme4) with badger identity  
156 (tattoo) number as a random effect was used to measure univariate effects of MusGHV-1 reactivation  
157 in genital tracts with season, sex, age, age class, BCS, number of residents per sett, and percentage of  
158 cubs per social group (calculated by sett), where we categorized these data on percentage of cubs per  
159 group into low and high using 30% as the dividing point according to distribution of the data (Figure  
160 S1). Effects of lactation were analyzed using Fisher's exact tests due to low sample sizes and  
161 presented using odds ratios. The final multivariable model was selected through the manual  
162 backwards selection method. Model residual diagnostics were conducted using R package DHARMA  
163 (version 0.3.3.0). Model fit was established using area-under-receiver-operating characteristics (AUC)  
164 (53). Kruskal-Wallis tests were used to compare genital MusGHV-1 positive and negative individuals of  
165 different BCS. Because juveniles (especially cubs) are generally thinner than adults, and thus have a  
166 different body condition distribution (Figure S2), we calculated a body condition index (BCI) as  $\ln(\text{body weight})/\ln(\text{body length})$  (36)). We analysed the association of MusGHV-1 reactivation and individual  
167 BCS for juveniles and adults separately. Linear models (lm function, R package lme4) were used to  
168 assess the association of age and MusGHV-1 reactivation prevalence.  
169

170

## 171 Results

172 The overall prevalence of genital MusGHV-1 reactivation was 35.9% (90/251, 95% CI: 30.2% - 42.0%),  
173 and prevalence was generally higher in summer (45%, 36/80) than in spring (34.4%, 33/96) and  
174 autumn (28%, 21/75) (Table 2; Figure 1).

175

### 176 Age effects on seasonal and sex-specific patterns of genital MusGHV-1 reactivation

177 There was strong evidence for an effect of age on genital MusGHV-1 where prevalence followed a U-  
178 shaped age curve, being lowest for badgers at the age of 5 or 6 years old (Figure 2, quadratic term,  
179 adjusted  $R^2 = 0.683$ , F-statistic = 12.83 on 2 and 9 DF, p-value = 0.002). When divided by age classes,  
180 prevalences in juveniles (46.6%, 34/73) and very old badgers (47.7%, 21/44) were higher than young  
181 (30.9%, 30/97) and old (13.5%, 5/37) adults (Table 2). However, no effect of sex (logistic regression  
182 analysis, p=0.679) was observed in the univariate analysis.

183

### 184 BCS effects on seasonal and sex-specific patterns of genital MusGHV-1 reactivation

185 Although adults with lower BCS had a higher probability of genital MusGHV-1 reactivation according  
186 to our univariate analysis (p-value=0.022, Table 2), when grouped by seasons and sex this relationship  
187 was only significant in adult males in summer (Kruskal-Wallis tests, p-value = 0.006) (Figure 3).

188

### 189 Group effects on seasonal and sex-specific patterns of genital MusGHV-1 reactivation

190 Genital MusGHV-1 reactivation was significantly more prevalent in females living in setts comprised  
191 by >30% cubs (logistic regression analysis, p-value = 0.002), but there was no evidence for the absolute  
192 number of adults, cubs nor the total number of badgers resident in each sett affecting reactivation  
193 rates (Table 2).

194

#### 195 Effects of recent reproductive success on female genital MusGHV-1 prevalence

196 There was no evidence for recent lactation affecting the reactivation rate in sexually mature females  
197 in spring (Fisher's exact test, p-value=1) (Table 2).

198

#### 199 Multivariable analysis of genital MusGHV-1 reactivation

200 Because the univariate analysis indicated that juveniles and adults appear to have different patterns  
201 of reactivation, we separated these data to generate multivariable models of juveniles (n=73) and  
202 adults (n=178). We included all variables initially for which there was any evidence for an effect in the  
203 univariate analyses (p-value <0.10, Table 2). The most parsimonious models for juveniles (Table 3) and  
204 adults (Table 4) both had diagnostically acceptable (53) AUC area of 0.748 and 0.726 (Figure S3 and  
205 S4), respectively. In juveniles, multivariable analysis showed that all females, and all juveniles with  
206 higher BCS, were at particular risk of genital MusGHV-1 reactivation (Table 3). In adults, in contrast,  
207 males are at a higher risk of MusGHV-1 reactivation than are females, where all adults experience the  
208 highest reactivation risk in summer, and older ( $\geq 8$  years) badgers, and female living in setts with a  
209 higher percentage (over 30%) of cubs are at particular risk (Table 4).

210

#### 211 Genetic diversity of MusGHV-1 in the Wytham badger population

212 We sequenced 5 MusGHV-1 positive PCR products of a partial DNA polymerase gene. All sequences  
213 were trimmed to 694 base pairs and confirmed to be MusGHV-1 according to the NCBI online blasting  
214 service, returning 98.7% (n=3) and 100% (n=2) nucleotide identity to the published MusGHV-1  
215 sequence isolated from a badger in Cornwall, England (Accession number: AF275657).

216

## 217 **Discussion**

218 Herpesvirus reactivation triggered by stress has been widely confirmed naturally and experimentally  
219 by corticosteroid injection in humans and domestic animals (5, 14). Linking stress and viral reactivation  
220 in wildlife, however, is particularly challenging due to the difficulties of monitoring individual stress  
221 levels in the field, and typically this relationship can only be confirmed experimentally by taking  
222 subjects into captivity at least temporarily (15). Using indicators that have been linked to stress  
223 hormone levels in previous studies can thus provide an informative way to study the relationship  
224 between stress and herpesvirus reactivation in free-ranging wildlife.

225

226 Faecal corticosteroid measurements from badgers in Ireland (30) evidence higher stress levels in  
227 summer likely associated with dry environmental conditions that result in lower earthworm availability



228 (i.e., the badgers' main food type (46)); similarly, in our own study population, summer drought is an  
229 established mortality factor due to starvation/ malnutrition (32, 33). This corresponds with our finding  
230 that, in all adults, seasonal MusGHV-1 reactivation rates were highest in summer, but females tended  
231 to have higher viral reactivation levels than males in spring – possibly due to reproductive stresses,  
232 while the reverse was true in autumn (Figure 1) (30). Interestingly, however, we found no correlation  
233 between BCS and MusGHV-1 reactivation across all seasons in females, implying that reduced body  
234 condition was not necessarily indicative of physiological stress. In fact, Bright Ross et al. (subm) found  
235 complex relationships between body-condition, survival and reproductive success in this same  
236 population, where although breeding females lose condition, they often end up being no thinner than  
237 non-breeding females as they were in much better condition in winter (i.e. before pregnancy/  
238 lactation).

239

240 From the perspective of male rates of reactivation, males with higher testosterone levels tend to be  
241 thinner during spring and summer (54), but tend to mate more often (55). In our recent survey of Irish  
242 badger populations (20), the high rate (over 80%) of genital MusGHV-1 reactivation in adult males  
243 during the peak (postpartum) mating season, from mid-January to mid-February, implies not only a  
244 link to mating activity, but also a mechanism enhancing transmission. This corroborates another  
245 finding in the same study that males with more spermatozoa have a higher prevalence of genital  
246 MusGHV-1 reactivation (20); linking higher sexual activity to higher STI prevalence as reported also in  
247 many other studies (56–59). We were unable to explicitly test effects relating to badger mating  
248 behaviour in our study because we can not trap during late pregnancy and neonatal cub care, to avoid  
249 stressing mothers or depriving cubs of maternal care. Nevertheless, although reactivation rate in  
250 autumn, when food sources are most abundant, and badgers undergo a period of reproductive  
251 quiescence (60), and thus experience less implicit stress, was significantly lower compared only to  
252 summer, but not to spring. This suggests that other factor(s) (e.g. sex hormone cycles (61), oxidative  
253 stress (62), genital microbiome (63) or bacterial co-infections) might also be affecting reactivation  
254 rates, beyond the scope of our current study.

255

256 In terms of age class effects, the high genital reactivation rate detected in cubs and yearlings suggests  
257 that badgers contract MusGHV-1 early in life, before reaching sexual maturity. Although MusGHV-1  
258 reactivates repeatedly throughout life, reactivation tends to be less frequent in young and old adults  
259 compared to adults in their prime, although rates increase in very old individuals. This matches  
260 patterns in humans where most people become infected with herpes during their childhood/  
261 adolescence (e.g. 100% and 70% seroprevalence of EBV before age 14 in Hong Kong and the United  
262 Kingdom (64)), then typically experience viral latency during their prime, but can suffer from  
263 increasingly longer and more frequent herpesvirus reactivation that sometimes cause mild disease  
264 (e.g., shingles (65) in old age due to lowered immune response (66, 67)).

265

266 Since vertical transmission of MusGHV-1 through the placenta is unlikely (20), and the potential for  
267 infection from the vaginal tract during parturition is equally low due to low genital MusGHV-1  
268 reactivation rate in pregnant females (20), we hypothesise that cubs contract primary infection  
269 through close contact with virus-shedding conspecifics (20). Thereafter genital reactivation in cubs  
270 may arise after primary acute infection through non-sexual routes and subsequent latency, as  
271 observed in the murine model where *Murine herpesvirus 4* (MuHV-4, also a gammaherpesvirus),  
272 inoculation in the nasal cavity results in acute infection in the respiratory tract and lungs and  
273 establishes latency in the spleen, but then reactivates in the vaginal tract 17-21 days after inoculation  
274 (61). MuHV-4 nasal cavity inoculation, however, does not result in reactivation in male genital tracts,  
275 and transmission is only possible from females to males. After sexual intercourse with virus-shedding  
276 female mice, the virus then replicates in the male penis for 3 weeks. Interestingly, also in badgers,  
277 female juveniles are at higher risk of MusGHV-1 reactivation in the genital tract than are males.  
278 Furthermore, juveniles in better body condition, regardless of sex, exhibit higher reactivation  
279 prevalence. Indeed, juvenile males in better body condition enter puberty earlier than thinner males  
280 (11 months compared to 22 – 28 months: (57)). Once juveniles enter puberty they will experience an  
281 increased risk of contracting MusGHV-1 through sexual contact and/ or that their latent infection is  
282 reactivated through mating resulting in viral shedding in the genital tract.

283

284 Our results also show that social group structure can affect prevalence of genital herpesvirus  
285 reactivation, particularly the proportion of cubs within a residential group. This trend was more  
286 apparent in females than in males. This may be because badger cubs generally carry higher pathogen  
287 burdens than adults (68, 69), and thus increase per capita immunity burden among all badgers resident  
288 in the respective sett (64).

289

## 290 **Conclusion**

291 Our study demonstrates - for the first time in the wild - the link between stress experienced by the  
292 host and latent virus reactivation. Amplified stress levels induced by human disturbance as well as  
293 food insecurity and more frequent catastrophic weather events arising from human induced rapid  
294 environmental change (HIREC) could therefore not only increase the risk of disease development,  
295 promotion of transmission within a population, but also negatively impact host reproductive fitness  
296 through latent virus reactivation in the reproductive tract (19). Careful monitoring of endemic latent  
297 virus infection as well as surveillance for possible newly emerging strains should be included when  
298 planning *in situ* and *ex situ* conservation programmes for endangered species (70).

299

## 300 **Acknowledgments**

301 The authors would like to thank Dr. Nadine Sugianto, Dr. Sil van Lieshout, Dr. Tanesha Allen, and Julius  
302 Bright-Ross for assistance with sample collection, fieldwork and MNA data provision. MST would like  
303 to thank the Ministry of Education in Taiwan and Lady Margaret Hall, University of Oxford, for



304 scholarship support. The authors also thank Paul Johnson and Ta-Chun Liu for providing advice on  
305 statistics. The authors claim no conflict of interests in the present work.

306

307 **Author Contributions**

308 Project conception: CBD,MST; samples collection: CBD,CN,MST ; laboratory work: MST ; data  
309 analysis: MST; writing and revision: MST,CBD,SF,DWM; All authors have read and approved the  
310 manuscript.

311

312

313 Table 1: Details of swab sampling

| Age class      | Age | Spring    |           | Summer    |           | Autumn    |           | Total      |
|----------------|-----|-----------|-----------|-----------|-----------|-----------|-----------|------------|
|                |     | Female    | Male      | Female    | Male      | Female    | Male      |            |
| Cub            | 0   | 15        | 15        | 10        | 4         | 9         | 9         | <b>62</b>  |
| Yearling       | 1   | 1         | 3         | 2         | 2         |           | 3         | <b>11</b>  |
|                | 2   | 7         | 7         | 7         | 9         | 5         | 6         | <b>41</b>  |
| Young adult    | 3   | 4         | 8         | 3         | 5         | 2         | 8         | <b>30</b>  |
|                | 4   | 2         | 5         | 4         | 5         | 2         | 8         | <b>26</b>  |
| Old adult      | 5   | 2         | 1         | 6         | 1         | 3         | 1         | <b>14</b>  |
|                | 6   | 3         | 1         | 3         | 1         | 3         |           | <b>11</b>  |
|                | 7   |           | 2         |           | 2         |           | 2         | <b>6</b>   |
|                | NA  | 1         | 1         | 1         | 1         |           | 2         | <b>6</b>   |
| Very old adult | 8   | 4         | 4         | 4         | 3         | 1         | 3         | <b>19</b>  |
|                | 9   | 2         | 1         | 2         | 1         | 1         | 1         | <b>8</b>   |
|                | 10  | 3         | 1         | 3         |           | 4         |           | <b>11</b>  |
|                | 11  |           |           |           |           |           |           | <b>0</b>   |
| Very old adult | 12  |           |           |           |           |           |           | <b>0</b>   |
|                | 13  | 1         | 1         |           | 1         | 1         |           | <b>4</b>   |
|                | NA  |           | 1         |           |           |           | 1         | <b>2</b>   |
| Total          |     | <b>45</b> | <b>51</b> | <b>45</b> | <b>35</b> | <b>31</b> | <b>44</b> | <b>251</b> |

314

315 Table 2: Overview of genital MusGHV-1 reactivation prevalence and univariate logistic regression  
 316 analysis. Formula: MusGHV ~ Variate + (1|Tattoo); number of observations: 251; groups by tattoo  
 317 number: 150  
 318

|                                  | Positive | Total | Prevalence | Prevalence 95% CI | Odds ratio (OR) | OR 95% CI           | P-value      |
|----------------------------------|----------|-------|------------|-------------------|-----------------|---------------------|--------------|
| Sex                              |          |       |            |                   |                 |                     |              |
| Male                             | 45       | 130   | 34.62%     | 27% - 43.1%       | 0.59            | 0.53 - 1.52         | 0.679        |
| Female                           | 45       | 121   | 37.19%     | 29.1% - 46.1%     |                 |                     |              |
| Season                           |          |       |            |                   |                 |                     |              |
| Spring                           | 33       | 96    | 34.38%     | 25.6% - 44.3%     | 1.37            | 0.7 - 2.69          | 0.362        |
| Summer                           | 36       | 80    | 45.00%     | 34.6% - 55.9%     | <b>2.16</b>     | <b>1.08 - 4.33</b>  | <b>0.03</b>  |
| Autumn                           | 21       | 75    | 28.00%     | 19.1% - 39%       |                 |                     |              |
| Age class                        |          |       |            |                   |                 |                     |              |
| Juvenile (<2 years old)          | 34       | 73    | 46.58%     | 35.6% - 57.9%     | <b>5.58</b>     | <b>1.95 - 15.92</b> | <b>0.001</b> |
| Young (2 - 4 years old)          | 30       | 97    | 30.93%     | 22.6% - 40.7%     | <b>2.87</b>     | <b>1.02 - 8.08</b>  | <b>0.046</b> |
| Old (5 - 7 years old)            | 5        | 37    | 13.51%     | 5.9% - 28%        |                 |                     |              |
| Very old (>7 years old)          | 21       | 44    | 47.73%     | 33.8% - 62.1%     | <b>5.84</b>     | <b>1.92 - 17.78</b> | <b>0.002</b> |
| Age                              |          |       |            |                   |                 |                     |              |
| Age                              |          | 243   |            |                   |                 |                     | <0.001       |
| Age <sup>2</sup>                 |          | 243   |            |                   |                 |                     | <0.001       |
| Body Condition <sup>a</sup>      |          |       |            |                   |                 |                     |              |
| Body condition score             |          | 182   |            |                   |                 |                     | 0.0416       |
| Sett group size                  |          |       |            |                   |                 |                     |              |
| Total                            |          | 251   |            |                   |                 |                     | 0.814        |
| Adult                            |          | 251   |            |                   |                 |                     | 0.434        |
| Cub                              |          | 251   |            |                   |                 |                     | 0.086        |
| Cub percentage per sett          |          |       |            |                   |                 |                     |              |
| Low (<30%)                       | 58       | 191   | 30.37%     | 24.3% - 37.2%     |                 |                     |              |
| High (>30%)                      | 32       | 60    | 53.33%     | 40.9% - 65.4%     | <b>2.62</b>     | <b>1.23 - 4.83</b>  | <b>0.002</b> |
| Lactational status <sup>cd</sup> |          |       |            |                   |                 |                     |              |
| Not Lactated                     | 3        | 10    | 30.00%     | 10.8% - 60.3%     |                 |                     |              |
| Lactated                         | 6        | 18    | 33.33%     | 16.3% - 56.3%     | 1.17            | 0.22 - 6.21         | 1            |

319

320 a: Only adults were included in this analysis

321 b: Only females captured in spring were included in this analysis

322 c: Fisher exact test

323

324 Table 3: Final general mixed effect model of multivariable logistic regression analysis for juveniles  
 325 Formula: MusGHV ~ Sex + Body condition + (1|Tattoo); number of observations: 72; groups by tattoo  
 326 number: 48  
 327

| Group          | Estimate | Standard error | z value | Adjusted OR | 95% CI             | p value       |
|----------------|----------|----------------|---------|-------------|--------------------|---------------|
| (Intercept)    | -1.226   | 0.7851         | -1.562  |             |                    | 0.1184        |
| Sex            |          |                |         |             |                    |               |
| Female         |          |                |         |             |                    |               |
| Male           | -1.0519  | 0.5123         | -2.054  | <b>0.35</b> | <b>0.13 - 0.95</b> | <b>0.04</b>   |
| Body Condition |          |                |         |             |                    |               |
| BCS            | 0.6245   | 0.2876         | 2.172   | <b>1.87</b> | <b>1.06 - 3.28</b> | <b>0.0299</b> |

328  
 329 Table 4: Final general mixed effect model of multivariable logistic regression analysis for adults  
 330 Formula: MusGHV ~ Sex + Season + AgeGroup + Cub percentage + Sex\*Cub percentage + (1|Tattoo);  
 331 Number of observations: 178; Groups by tattoo number: 101  
 332

| Group                   | Estimate | Standard error | z value | Adjusted OR | 95% CI              | p value          |
|-------------------------|----------|----------------|---------|-------------|---------------------|------------------|
| (Intercept)             | -0.9952  | 0.4859         | -2.048  |             |                     | 0.04             |
| Sex                     |          |                |         |             |                     |                  |
| Female                  |          |                |         |             |                     |                  |
| Male                    | 0.8171   | 0.4126         | 1.98    | <b>2.26</b> | <b>1 - 5.1</b>      | <b>0.048</b>     |
| Season                  |          |                |         |             |                     |                  |
| Spring                  | -1.037   | 0.4255         | -2.437  | 1.61        | 0.66 - 3.91         | 0.297            |
| Summer                  | -2.2692  | 0.6333         | -3.583  | <b>3.08</b> | <b>1.27 - 7.47</b>  | <b>0.013</b>     |
| Autumn                  |          |                |         |             |                     |                  |
| Age class               |          |                |         |             |                     |                  |
| Young                   | -1.1084  | 0.468          | -2.368  | <b>0.35</b> | <b>0.15 - 0.82</b>  | <b>0.015</b>     |
| Old                     | -2.4001  | 0.7052         | -3.404  | <b>0.1</b>  | <b>0.03 - 0.36</b>  | <b>&lt;0.001</b> |
| Very old                |          |                |         |             |                     |                  |
| Cub percentage per sett |          |                |         |             |                     |                  |
| Low (<30%)              |          |                |         |             |                     |                  |
| High (>30%)             | 1.8903   | 0.6968         | 2.713   | <b>6.62</b> | <b>1.69 - 25.95</b> | <b>0.006</b>     |
| Interaction             |          |                |         |             |                     |                  |
| Female:Cub percentage   |          |                |         |             |                     |                  |
| Male:Cub percentage     | -2.3686  | 1.0492         | -2.258  | <b>0.09</b> | <b>0.01 - 0.73</b>  | <b>0.024</b>     |

333  
 334

335 References

- 336 1. Roizman B, Baines J. 1991. The diversity and unity of herpesviridae. *Comp Immunol Microbiol*  
337 *Infect Dis* 14:63–79.
- 338 2. Pellett PE. 2014. Trunkloads of Viruses. *J Virol* 88:13520–13522.
- 339 3. Woźniakowski G, Samorek-Salamonowicz E. 2015. Animal herpesviruses and their zoonotic  
340 potential for cross-species infection. *Ann Agric Environ Med* 22:191–194.
- 341 4. Brito AF, Pinney JW. 2020. Intrahost speciations and host switches shaped the evolution of  
342 herpesviruses. *bioRxiv* 418111.
- 343 5. Seeber PA, Quintard B, Sicks F, Dehnhard M, Greenwood AD, Franz M. 2018. Environmental  
344 stressors may cause equine herpesvirus reactivation in captive Grévy's zebras (*Equus grevyi*).  
345 *PeerJ* 2018:1–18.
- 346 6. Stowe RP, Pierson DL, Barrett ADT. 2001. Elevated stress hormone levels relate to Epstein-Barr  
347 virus reactivation in astronauts. *Psychosom Med* 63:891–895.
- 348 7. Grinde B. 2013. Herpesviruses: latency and reactivation – viral strategies and host response. *J*  
349 *Oral Microbiol* 5:22766.
- 350 8. Donofrio G, Cavirani S, Van Santen V, Flammini CF. 2005. Potential secondary pathogenic role  
351 for bovine herpesvirus 4. *J Clin Microbiol* 43:3421–3426.
- 352 9. Barton E, Mandal P, Speck SH. 2011. Pathogenesis and Host Control of Gammaherpesviruses:  
353 Lessons from the Mouse. *Annu Rev Immunol* 29:351–397.
- 354 10. Goodman LB, Loregian A, Perkins GA, Nugent J, Buckles EL, Mercorelli B, Kydd JH, Palù G,  
355 Smith KC, Osterrieder N, Davis-Poynter N. 2007. A point mutation in a herpesvirus polymerase  
356 determines neuropathogenicity. *PLoS Pathog* 3:1583–1592.
- 357 11. Zhang P, Wang J, Zhang X, Wang X, Jiang L, Gu X. 2020. Identification of AIDS-Associated  
358 Kaposi Sarcoma: A Functional Genomics Approach. *Front Genet* 10:1–12.
- 359 12. Stalder K, Vaz PK, Gilkerson JR, Baker R, Whiteley P, Ficorilli N, Tatarczuch L, Portas T, Skogvold  
360 K, Anderson GA, Devlin JM. 2015. Prevalence and clinical significance of herpesvirus infection  
361 in populations of Australian marsupials. *PLoS One* 10:1–15.
- 362 13. Morey JN, Boggero IA, Scott AB, Segerstrom SC. 2015. Current directions in stress and human  
363 immune function. *Curr Opin Psychol* 5:13–17.
- 364 14. Barrandeguy M, Vissani A, Olguin C, Becerra L, Miño S, Pereda A, Oriol J, Thiry E. 2008.  
365 Experimental reactivation of equine herpesvirus-3 following corticosteroid treatment. *Equine*  
366 *Vet J* 40:593–595.
- 367 15. das Neves CG, Mørk T, Thiry J, Godfroid J, Rimstad E, Thiry E, Tryland M. 2009. Cervid  
368 herpesvirus 2 experimentally reactivated in reindeer can produce generalized viremia and  
369 abortion. *Virus Res* 145:321–328.
- 370 16. Glaser R, Pearl DK, Kiecolt-Glaser JK, Malarkey WB. 1994. Plasma cortisol levels and  
371 reactivation of latent Epstein-Barr virus in response to examination stress.  
372 *Psychoneuroendocrinology* 19:765–772.

- 373 17. Sin YW, Annavi G, Dugdale HL, Newman C, Burke T, MacDonald DW. 2014. Pathogen burden,  
374 co-infection and major histocompatibility complex variability in the European badger (*Meles*  
375 *meles*). *Mol Ecol* 23:5072–5088.
- 376 18. King DP, Mutukwa N, Lesellier S, Cheeseman C, Chambers MA, Banks M. 2004. Detection of  
377 Mustelid Herpesvirus-1 Infected European Badgers (*Meles meles*) in the British Isles. *J Wildl*  
378 *Dis* 40:99–102.
- 379 19. Kent A, Ehlers B, Mendum T, Newman C, Macdonald DW, Chambers M, Buesching CD. 2017.  
380 Genital tract screening finds widespread infection with mustelid gammaherpesvirus 1 in the  
381 European badger (*Meles meles*). *J Wildl Dis* 54:133–137.
- 382 20. Tsai MS, Fogarty U, Byrne AW, O'keeffe J, Newman C, Macdonald DW, Buesching CD. 2020.  
383 Effects of mustelid gammaherpesvirus 1 (*Musghv-1*) reactivation in european badger (*meles*  
384 *meles*) genital tracts on reproductive fitness. *Pathogens* 9:1–17.
- 385 21. Dittmer DP, Damania B. 2013. Kaposi sarcoma associated herpesvirus pathogenesis (KSHV) -  
386 An update. *Curr Opin Virol* 3:238–244.
- 387 22. Young LS, Yap LF, Murray PG. 2016. Epstein-Barr virus: More than 50 years old and still  
388 providing surprises. *Nat Rev Cancer* 16:789–802.
- 389 23. Chastant-Maillard S. 2015. Impact of bovine herpesvirus 4 (BoHV-4) on reproduction.  
390 *Transbound Emerg Dis* 62:245–251.
- 391 24. McLuckie AJ, Barrs VR, Lindsay S, Aghazadeh M, Sangster C, Beatty JA. 2018. Molecular  
392 diagnosis of *Felis catus* gammaherpesvirus 1 (FcaGHV1) infection in cats of known retrovirus  
393 status with and without lymphoma. *Viruses* 10.
- 394 25. Marenzoni ML, Sforza M, Stefanetti V, Casagrande Proietti P, Brignone L, Del Sero A, Falcioni  
395 F, Orvieto S, Tamantini C, Tiburzi A, Valentini S, Coletti M, Timoney PJ, Passamonti F. 2014.  
396 Detection of Equid herpesvirus type 2 and 5 DNA in uterine flushings of mares with  
397 reproductive disorders. *Vet Microbiol* 174:570–576.
- 398 26. Gagnon CA, Tremblay J, Larochelle D, Music N, Tremblay D. 2011. Identification of a novel  
399 herpesvirus associated with cutaneous ulcers in a fisher (*Martes pennanti*). *J Vet Diagnostic*  
400 *Investig* 23:986–990.
- 401 27. Tseng M, Fleetwood M, Reed A, Gill VA, Harris RK, Moeller RB, Lipscomb TP, Mazet JAK,  
402 Goldstein T. 2012. Mustelid herpesvirus-2, a novel herpes infection in northern sea otters  
403 (*Enhydra lutris kenyoni*). *J Wildl Dis* 48:181–185.
- 404 28. Nicolas de Francisco O, Esperón F, Juan-Sallés C, Ewbank AC, das Neves CG, Marco A, Neves E,  
405 Anderson N, Sacristán C. 2020. Neoplasms and novel gammaherpesviruses in critically  
406 endangered captive European minks (*Mustela lutreola*). *Transbound Emerg Dis* 1–13.
- 407 29. Abade dos Santos FA, Monteiro M, Pinto A, Carvalho CL, Peleteiro MC, Carvalho P, Mendonça  
408 P, Carvalho T, Duarte MD. 2020. First description of a herpesvirus infection in genus *Lepus*.  
409 *BioRxiv Prepr* <https://doi.org/http://dx.doi.org/10.1101/2020.01.21.913723>.



- 410 30. George SC, Smith TE, Mac Cana PSS, Coleman R, Montgomery WI. 2014. Physiological stress in  
411 the Eurasian badger (*Meles meles*): Effects of host, disease and environment. *Gen Comp*  
412 *Endocrinol* 200:54–60.
- 413 31. Virgós E, Mangas JG, Blanco-Aguilar JA, Garrote G, Almagro N, Viso RP. 2004. Food habits of  
414 European badgers (*Meles meles*) along an altitude gradient of Mediterranean environments:  
415 A field test of the earthworm specialization hypothesis. *Can J Zool* 82:41–51.
- 416 32. Macdonald DW, Newman C, Buesching CD, Nouvellet P. 2010. Are badgers “Under The  
417 Weather”? Direct and indirect impacts of climate variation on European badger (*Meles meles*)  
418 population dynamics. *Glob Chang Biol* 16:2913–2922.
- 419 33. Nouvellet P, Newman C, Buesching CD, Macdonald DW. 2013. A Multi-Metric Approach to  
420 Investigate the Effects of Weather Conditions on the Demographic of a Terrestrial Mammal,  
421 the European Badger (*Meles meles*). *PLoS One* 8.
- 422 34. Woodroffe R, MacDonald DW. 1995. Female/Female Competition in European Badgers *Meles*  
423 *meles*: Effects on Breeding Success. *J Anim Ecol* 64:12.
- 424 35. Creel SR, Creel NM. 1991. Energetics, reproductive suppression and obligate communal  
425 breeding in carnivores. *Behav Ecol Sociobiol* 28:263–270.
- 426 36. Macdonald DW, Newman C, Stewart PD, Domingo-Roura X, Johnson PJ. 2002. Density-  
427 dependent regulation of body mass and condition in badgers (*Meles meles*) from Wytham  
428 Woods. *Ecology* 83:2056–2061.
- 429 37. Macdonald DW, Harmsen BJ, Johnson PJ, Newman C. 2004. Increasing frequency of bite  
430 wounds with increasing population density in Eurasian badgers, *Meles meles*. *Anim Behav*  
431 67:745–751.
- 432 38. Hunter RG, McEwen BS. 2013. Stress and anxiety across the lifespan: Structural plasticity and  
433 epigenetic regulation. *Epigenomics* 5:177–194.
- 434 39. Van Lieshout SHJ, Badás EP, Mason MWT, Newman C, Buesching CD, Macdonald DW, Dugdale  
435 HL. 2020. Social effects on age-related and sex-specific immune cell profiles in a wild mammal:  
436 Immune cell profiles in a wild mammal. *Biol Lett* 16:0–6.
- 437 40. Dall’Ara P, Labriola C, Sala E, Spada E, Magistrelli S, Lauzi S. 2019. Prevalence of serum  
438 antibody titres against feline panleukopenia, herpesvirus and calicivirus infections in stray cats  
439 of Milan, Italy. *Prev Vet Med* 167:32–38.
- 440 41. Troyer RM, Beatty JA, Stutzman-Rodriguez KR, Carver S, Lozano CC, Lee JS, Lappin MR, Riley  
441 SPD, Serieys LEK, Logan KA, Sweanor LL, Boyce WM, Vickers TW, McBride R, Crooks KR, Lewis  
442 JS, Cunningham MW, Rovnak J, Quackenbush SL, VandeWoude S. 2014. Novel  
443 Gammaherpesviruses in North American Domestic Cats, Bobcats, and Pumas: Identification,  
444 Prevalence, and Risk Factors. *J Virol* 88:3914–3924.
- 445 42. Sebastiano M, Chastel O, De Thoisy B, Eens M, Costantini D. 2016. Oxidative stress favours  
446 herpes virus infection in vertebrates: A meta-analysis. *Curr Zool* 62:325–332.

- 447 43. Woodroffe R, Macdonald DW. 1995. Costs of breeding status in the European badger, *Meles*  
448 *meles*. *J Zool* 235:237–245.
- 449 44. Macdonald DW, Newman C, Nouvellet PM, Buesching CD. 2009. An Analysis of Eurasian  
450 Badger (*Meles meles*) Population Dynamics: Implications for Regulatory Mechanisms. *J*  
451 *Mammal* 90:1392–1403.
- 452 45. Dugdale HL, Davison D, Baker SE, Ellwood SA, Newman C, Buesching CD, Macdonald DW.  
453 2011. Female teat size is a reliable indicator of annual breeding success in European badgers:  
454 Genetic validation. *Mamm Biol* 76:716–721.
- 455 46. Macdonald DW, Feber RE, Newman C, Buesching CD. 2015. Badgers in the rural landscape -  
456 conservation paragon or farmland pariah? Lessons from the Wytham Badger Project. *Wildl*  
457 *Conserv Farml*, 2nd ed. 2:65–95.
- 458 47. Bright Ross JG, Newman C, Buesching CD, Macdonald DW. 2020. What lies beneath?  
459 Population dynamics conceal pace-of-life and sex ratio variation, with implications for  
460 resilience to environmental change. *Glob Chang Biol* 26:3307–3324.
- 461 48. Sugianto NA, Newman C, Macdonald DW, Buesching CD. 2020. Reproductive and Somatic  
462 Senescence in the European Badger (*Meles meles*): Evidence from Lifetime Sex-Steroid  
463 Profiles. *Zoology* 141:125803.
- 464 49. Thompson JD, Higgins DG, Gibson TJ. 1994. CLUSTAL W: Improving the sensitivity of  
465 progressive multiple sequence alignment through sequence weighting, position-specific gap  
466 penalties and weight matrix choice. *Nucleic Acids Res* 22:4673–4680.
- 467 50. Kumar S, Stecher G, Li M, Knyaz C, Tamura K. 2018. MEGA X: Molecular evolutionary genetics  
468 analysis across computing platforms. *Mol Biol Evol* 35:1547–1549.
- 469 51. R-Development-Core-Team. 2019. R: A language and environment for statistical computing. R  
470 Foundation for Statistical Computing, Vienna, Austria.
- 471 52. Wilson EB. 1927. Probable Inference, the Law of Succession, and Statistical Inference. *J Am*  
472 *Stat Assoc* 22:209.
- 473 53. Mandrekar JN. 2010. Receiver operating characteristic curve in diagnostic test assessment. *J*  
474 *Thorac Oncol* 5:1315–1316.
- 475 54. Buesching CD, Heistermann M, Macdonald DW. 2009. Seasonal and inter-individual variation  
476 in testosterone levels in badgers *meles meles*: Evidence for the existence of two  
477 endocrinological phenotypes. *J Comp Physiol A Neuroethol Sensory, Neural, Behav Physiol*  
478 195:865–871.
- 479 55. Dugdale HL, Griffiths A, Macdonald DW. 2011. Polygynandrous and repeated mounting  
480 behaviour in European badgers, *Meles meles*. *Anim Behav* 82:1287–1297.
- 481 56. Ryder JJ, Pastok D, Hoare MJ, Bottery MJ, Boots M, Knell RK, Atkinson D, Hurst GDD. 2013.  
482 Spatial variation in food supply, mating behavior, and sexually transmitted disease epidemics.  
483 *Behav Ecol* 24:723–729.

- 484 57. Munday PE, Pritchard G, Harris JRW, Taylor-Robinson D. 1983. Prevalence of chlamydial  
485 infection in promiscuous women. *Sex Transm Infect* 59:103–104.
- 486 58. White J, Richard M, Massot M, Meylan S. 2011. Cloacal bacterial diversity increases with  
487 multiple mates: Evidence of sexual transmission in female common lizards. *PLoS One* 6.
- 488 59. Poiani A. 2000. Sexually Transmitted Diseases: A Possible Cost of Promiscuity in Birds? *Auk*  
489 117:1061–1065.
- 490 60. Sugianto NA, Dehnhard M, Newman C, Macdonald DW, Buesching CD. 2021. A non-invasive  
491 method to assess the reproductive status of the European badger (*Meles meles*) from urinary  
492 sex-steroid metabolites. *Gen Comp Endocrinol* 301:113655.
- 493 61. François S, Vidick S, Sarlet M, Desmecht D, Drion P, Stevenson PG, Vanderplasschen A, Gillet L.  
494 2013. Illumination of Murine Gammaherpesvirus-68 Cycle Reveals a Sexual Transmission  
495 Route from Females to Males in Laboratory Mice. *PLoS Pathog* 9.
- 496 62. Costantini D, Seeber PA, Soilemetzidou SE, Azab W, Bohner J, Buuveibaatar B, Czirják G, East  
497 ML, Greunz EM, Kaczensky P, Lamglait B, Melzheimer J, Uiseb K, Ortega A, Osterrieder N,  
498 Sandgreen DM, Simon M, Walzer C, Greenwood AD. 2018. Physiological costs of infection:  
499 Herpesvirus replication is linked to blood oxidative stress in equids. *Sci Rep* 8:1–10.
- 500 63. Urbaniak C, Lorenzi H, Thissen J, Jaing C, Crucian B, Sams C, Pierson D, Venkateswaran K,  
501 Mehta S. 2020. The influence of spaceflight on the astronaut salivary microbiome and the  
502 search for a microbiome biomarker for viral reactivation. *Microbiome* 8:56.
- 503 64. Kangro HO, Osman HK, Lau YL, Heath RB, Yeung CY, Ng MH. 1994. Seroprevalence of  
504 antibodies to human herpesviruses in England and Hong Kong. *J Med Virol* 43:91–96.
- 505 65. Donahue JG. 1995. The incidence of herpes zoster. *Arch Intern Med* 155:1605–1609.
- 506 66. Stowe RP, Kozlova E V., Yetman DL, Walling DM, Goodwin JS, Glaser R. 2007. Chronic  
507 herpesvirus reactivation occurs in aging. *Exp Gerontol* 42:563–570.
- 508 67. Gouin JP, Hantsoo L, Kiecolt-Glaser JK. 2008. Immune dysregulation and chronic stress among  
509 older adults: A review. *Neuroimmunomodulation* 15:251–259.
- 510 68. Newman C, Macdonald DW, Anwar MA. 2001. Coccidiosis in the European badger, *Meles*  
511 *meles* in Wytham Woods: Infection and consequences for growth and survival. *Parasitology*  
512 123:133–142.
- 513 69. Albery G, Newman C, Ross JB, Bansal S, Buesching C. 2020. Negative density-dependent  
514 parasitism in a group-living carnivore <https://doi.org/10.1101/2020.06.15.153726>.
- 515 70. Kelly TR, Karesh WB, Johnson CK, Gilardi KVK, Anthony SJ, Goldstein T, Olson SH, Machalaba C,  
516 PREDICT Consortium, Mazet JAK. 2017. One Health proof of concept: Bringing a  
517 transdisciplinary approach to surveillance for zoonotic viruses at the human-wild animal  
518 interface. *Prev Vet Med* 137:112–118.
- 519

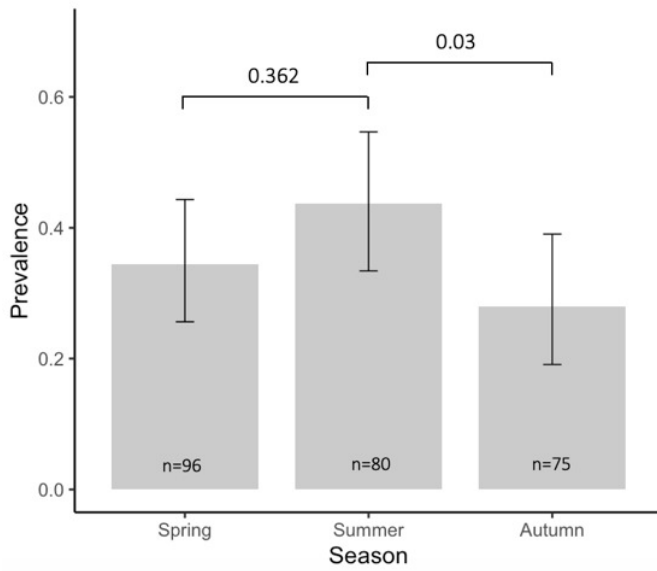

Figure 1: Difference of genital MusGHV-1 prevalence between seasons (Logistic regression analysis)

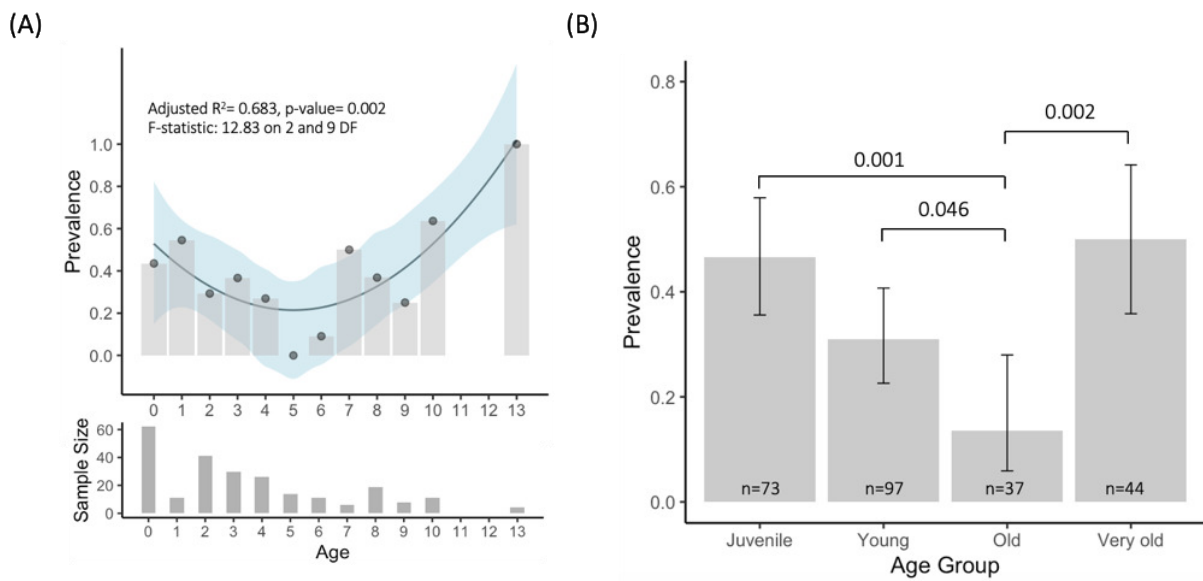

Figure 2: Difference of genital MusGHV-1 prevalence between exact age (A) and age groups (B) (Logistic regression analysis)

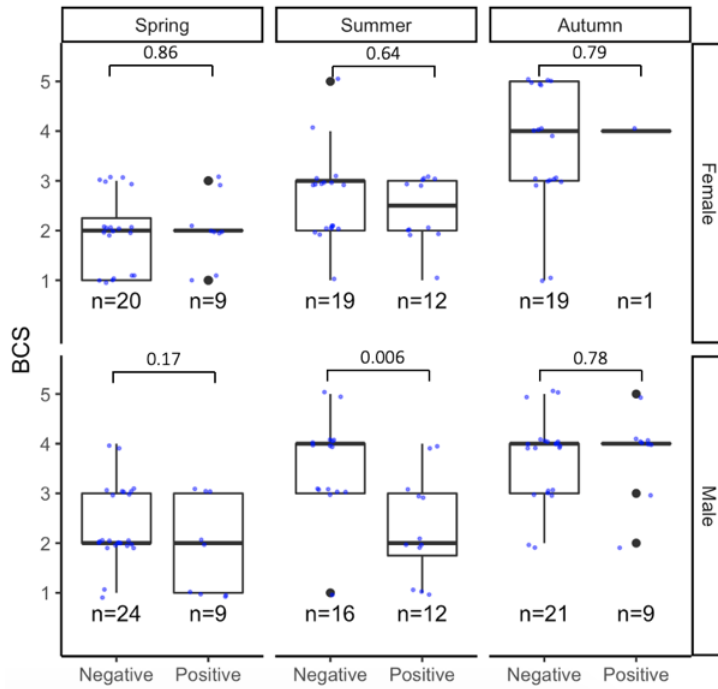

Figure 3: Comparison of body condition score difference of adults between genital MusGHV-1 reactivation status. The p-values of each Kruskal-Wallis test results are showing above each box plot.

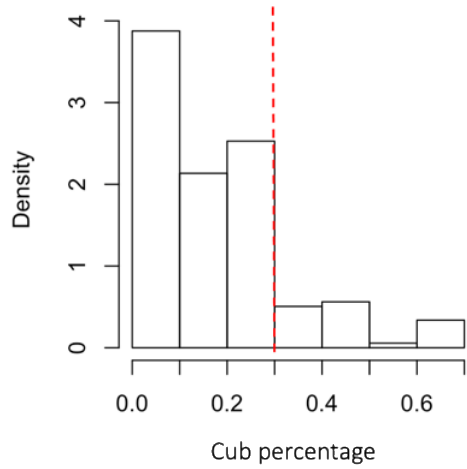

Figure S1: Data distribution of cub percentage (n=251). The cutoff point 30% (red dashed line) is used to divide the tail and the distribution in the left.

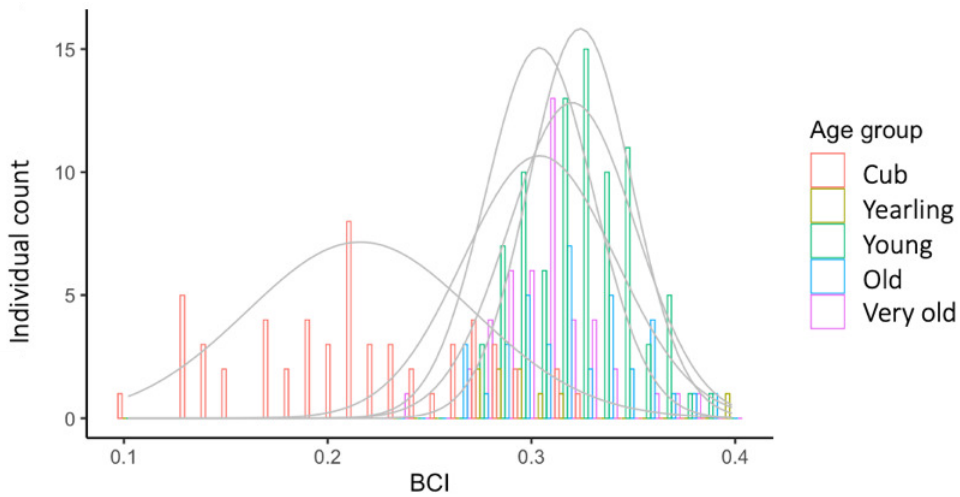

Figure S2: BCI data distribution by age groups showing distinct distribution of cub BCI comparing with other groups (A)



DHARMA residual diagnostics

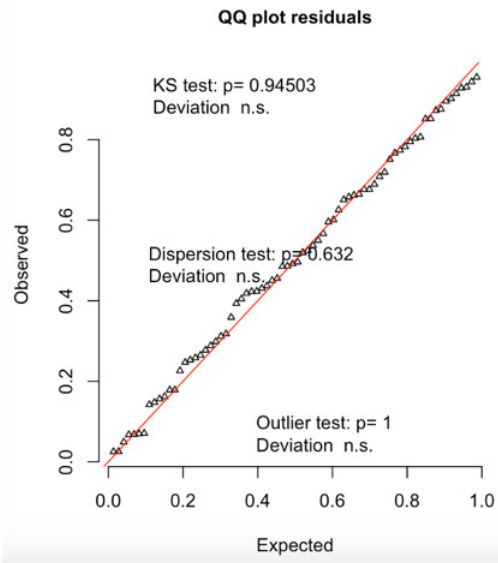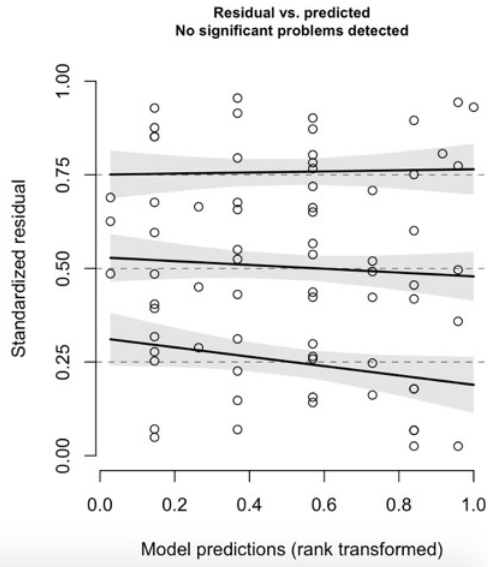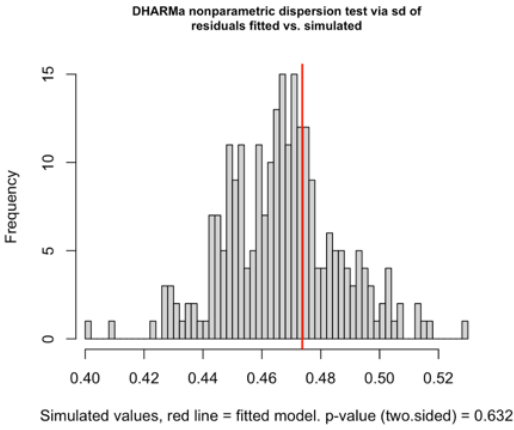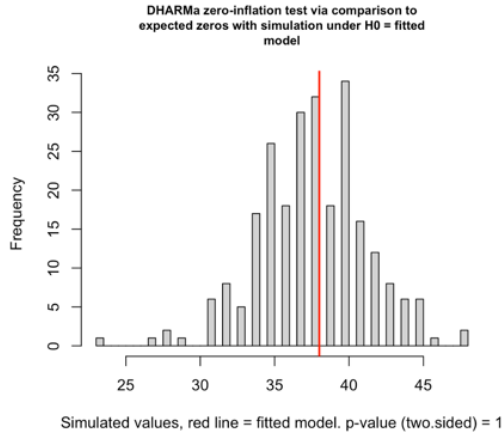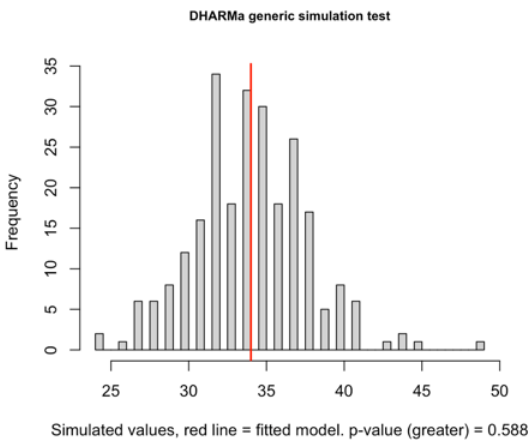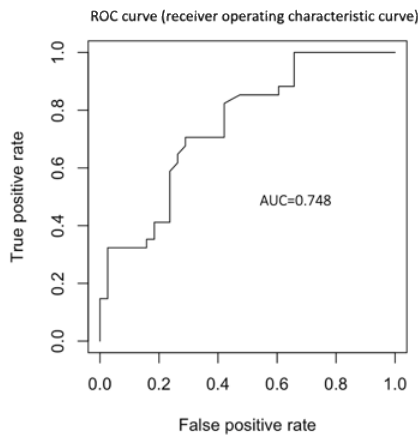

Figure S3: Diagnostic plot of the final multivariable logistic regression model of juvenile genital MusGHV-1 reactivation

DHARMA residual diagnostics

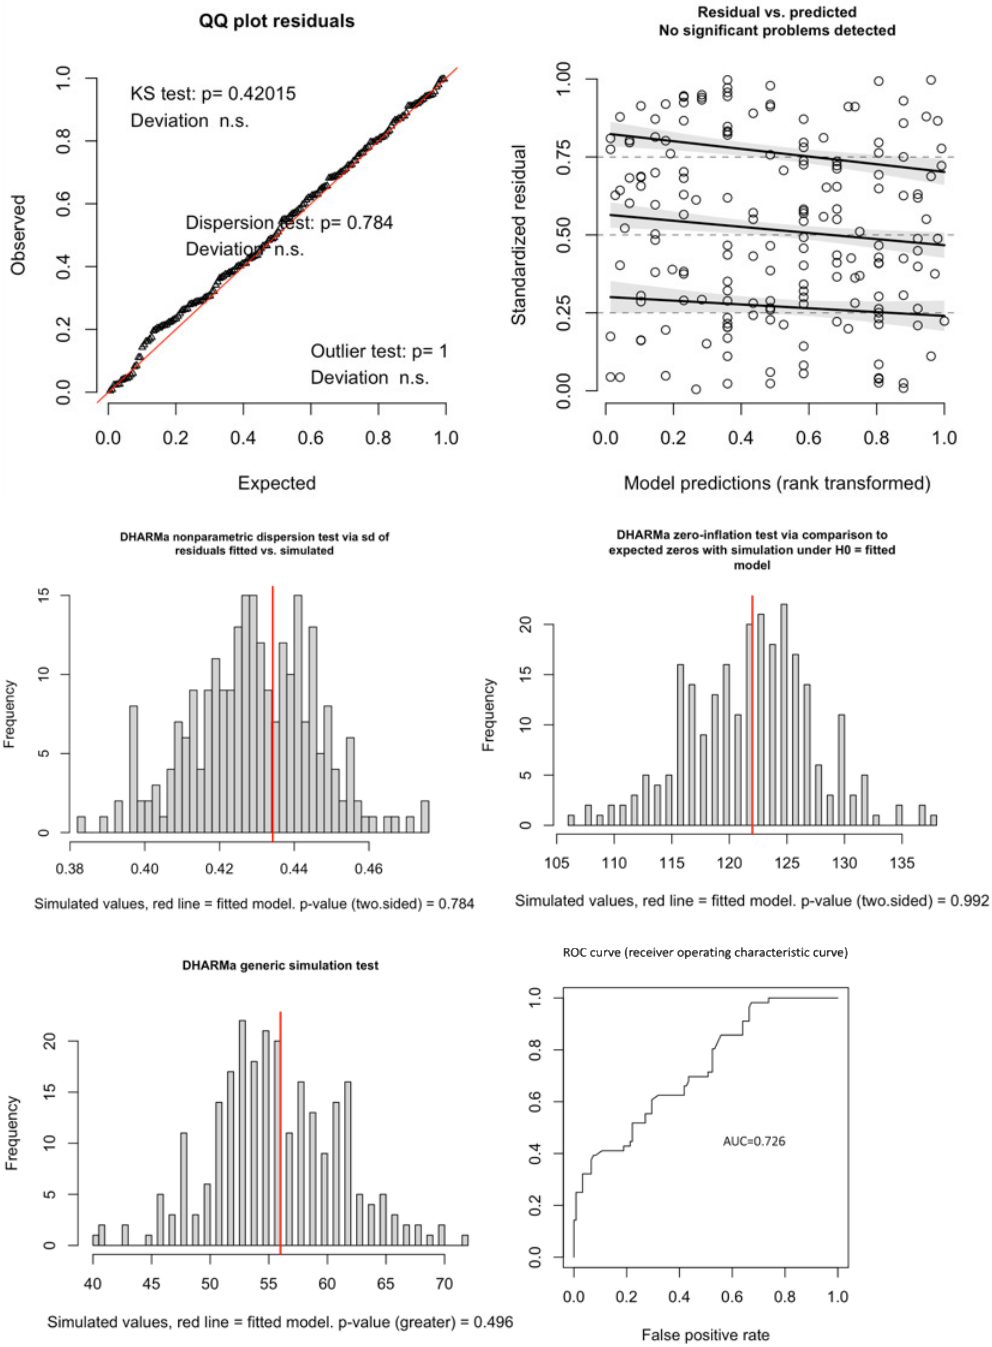

Figure S4: Diagnostic plot of the final multivariable logistic regression model of adult genital MusGHV-1 reactivation
